# Supplementary material
Source: MDPI journal article supplement (https://www.mdpi.com/2311-7524/8/11/1086)
Supplement: s1 [file s1]

**Article title:** Identification of a Leafy Head Formation Related Gene in Chinese Cabbage(*Brassica rapa* L. ssp. *pekinensis*)

**Journal name:** *Horticulturae*

**Author names:** Yonghui Zhao<sup>1</sup>, Chuanhong Liu<sup>1</sup>, Bing Fang<sup>2</sup>, Shengnan Huang<sup>1</sup>, Nan Wang<sup>1</sup>, Chong Tan<sup>1</sup>, Jie Ren<sup>1</sup>, Hui Feng<sup>1,\*</sup>

<sup>1</sup>College of Horticulture, Shenyang Agricultural University, Shenyang 110866, China

<sup>2</sup>Department of Foreign Language Teaching, Shenyang Agricultural University, Shenyang 110866, China

**e-mail:** fenghuiaaa@syau.edu.cn

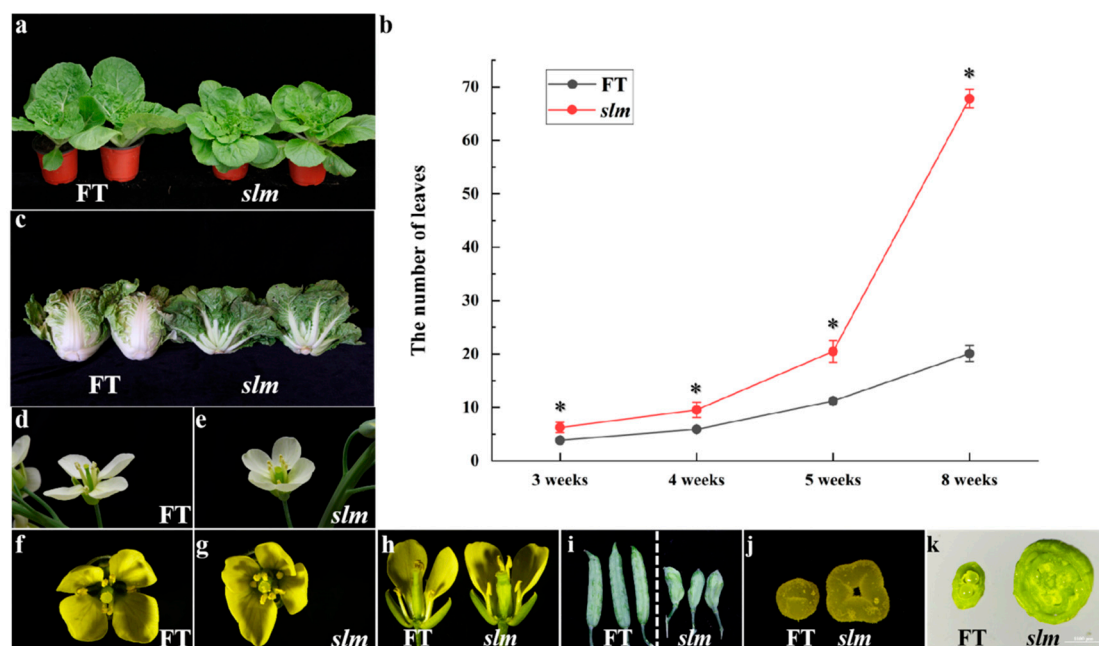

**Figure S1.** Phenotype characterize of FT and *slm*.

(a) Phenotype characterize of FT and *slm* at rosette stage. (b) The leaves number of FT and *slm*. \* represents significantly different based on the Student's *t*-test ( $P < 0.05$ ). (c) Phenotype characterize of FT and *slm* at heading stage. (d) Flower of FT. (e) Flower of *slm*. (f) Vertical view image of flower of FT. (g) Vertical view image of flower of *slm*. (h) Internal structure of flower of FT and *slm*. (i) Pod of FT and *slm*. (j) Stigma of FT and *slm*. (k) Transversal anatomical drawing of pistil of FT and *slm*. Scale is shown at the bottom.

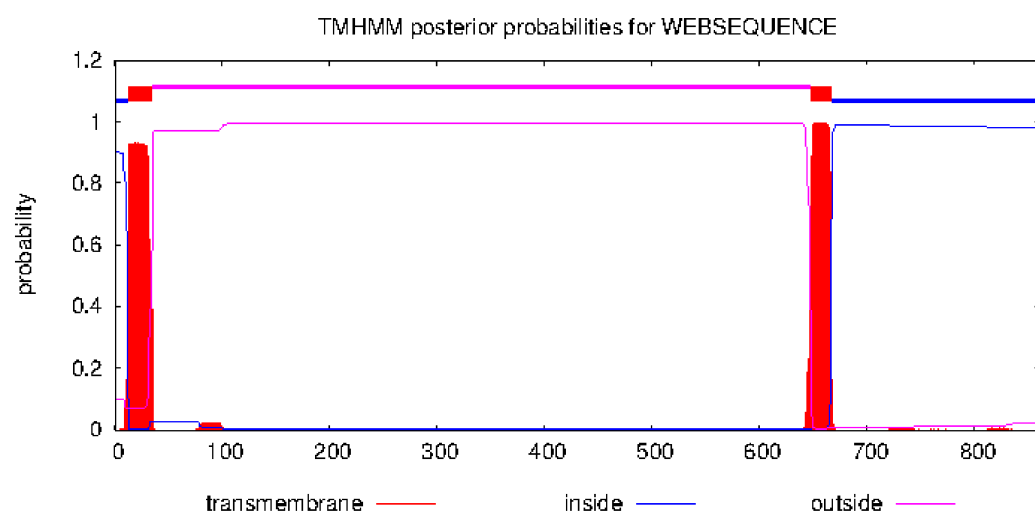

**Figure S2.** Prediction of transmembrane helices by TMHMM-2.0.

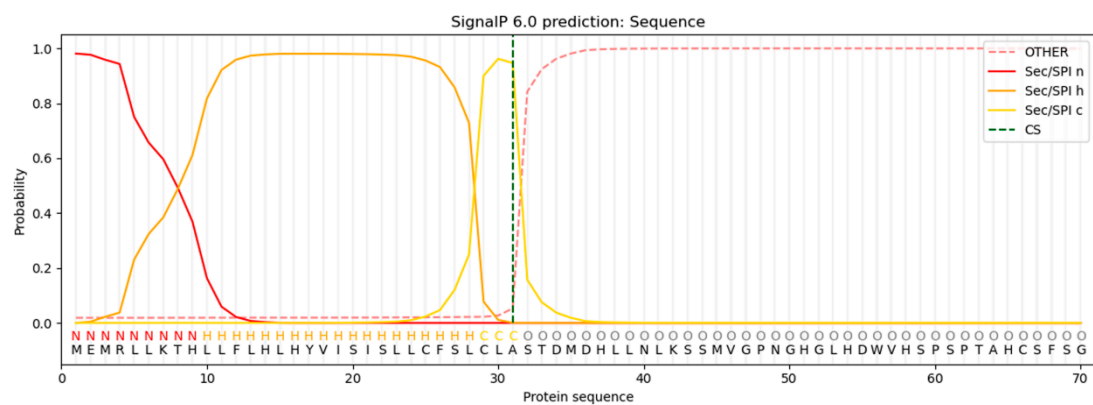

**Figure S3.** Prediction of signal peptides by SignalP-6.0.

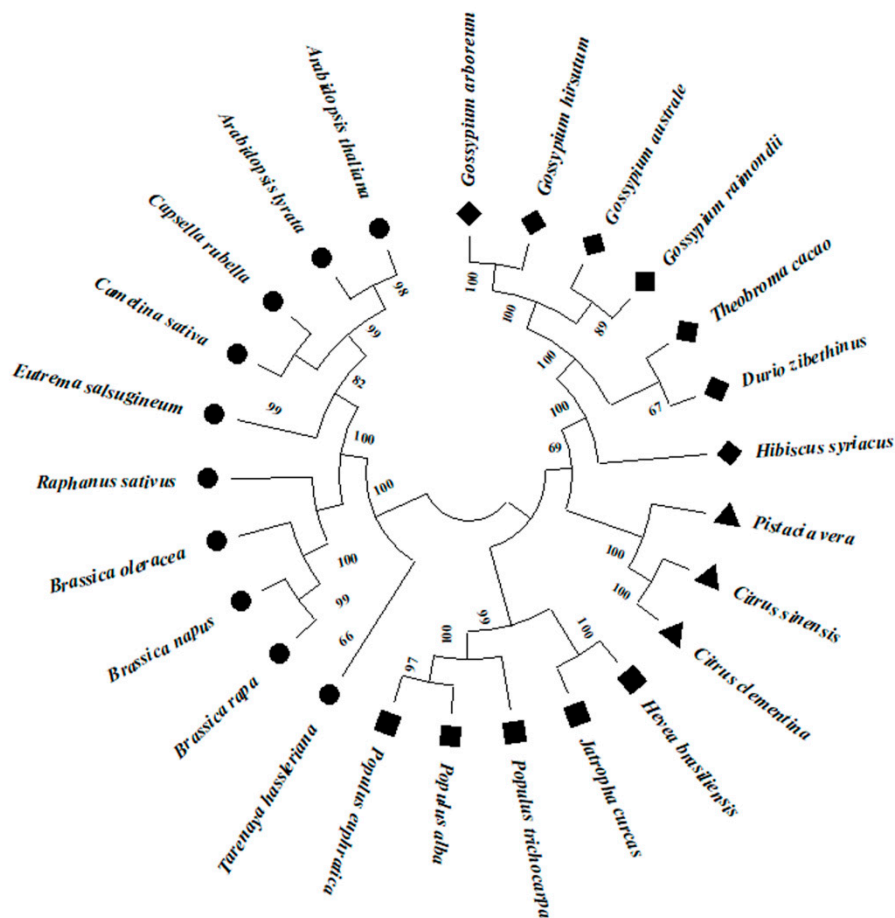

**Figure S4.** The phylogenetic evolutionary tree of CLV1.

The phylogenetic evolutionary tree of CLV1 was constructed in 25 species by MEGA-X with Clustal W and neighbor joining method based on 1,000 bootstrap replications. The species name and accession numbers of the 25 CLV1 homologs were as follows: *Brassica rapa* (XP\_009106236.1); *Brassica napus* (XP\_013717912.1); *Brassica oleracea* var. *Oleracea* (XP\_013591703.1); *Raphanus sativus* (XP\_018445747.1); *Eutrema salsugineum* (XP\_006390268.1); *Camelina sativa* (XP\_010428620.1); *Capsella rubella* (XP\_006300675.1); *Arabidopsis lyrata* subsp. *Lyrata* (XP\_020891600.1); *Arabidopsis thaliana* (NP\_177710.1); *Tarenaya hassleriana* (XP\_010536408.1); *Populus alba* (TKS03250.1); *Theobroma cacao* (EOY15070.1); *Gossypium arboreum* (XP\_017623398.1); *Gossypium australe* (KAA3484481.1); *Gossypium hirsutum* (XP\_016741841.1); *Gossypium raimondii* (XP\_012478138.1); *Durio zibethinus* (XP\_022772630.1); *Hibiscus syriacus* (KAE8659851.1); *Hevea brasiliensis* (XP\_021692733.1); *Jatropha curcas* (XP\_012073772.1); *Citrus sinensis* (XP\_006473681.1); *Citrus clementina* (XP\_006435205.1); *Populus trichocarpa* (XP\_002307734.1); *Pistacia vera* (XP\_031283197.1); *Populus euphratica* (XP\_011045060.1).

**Table S1.** Primer sequences of Kompetitive allele specific PCR.

| SNP<br>locati<br>on  | Allele primer -F1                                        | Allele primer -F2                                        | Common primer                        |
|----------------------|----------------------------------------------------------|----------------------------------------------------------|--------------------------------------|
| A07:<br>2690<br>5702 | GAAGGTCGGAGTCAACGG<br>ATTCCGGTTTAATCAGTTTA<br>AAATCTCTAA | GAAGGTGACCAAGTTCATG<br>CTCCGGTTTAATCAGTTTAA<br>AATCTCTAG | AGGGAGATGA<br>AGCTCTGAGG<br>AAT      |
| A07:<br>2757<br>1059 | GAAGGTCGGAGTCAACGG<br>ATTTTTTGCTCTCTCACTTTC<br>CCC       | GAAGGTGACCAAGTTCATG<br>CTAGTTTTGCTCTCTCACTT<br>TCCCT     | GGAAACTGGT<br>TGTCTGAATGT<br>CTC     |
| A07:<br>2792<br>1459 | GAAGGTCGGAGTCAACGG<br>ATTTGTGGTATTTGTAGGTG<br>AATAAGAAA  | GAAGGTGACCAAGTTCATG<br>CTTGTGGTATTTGTAGGTGA<br>ATAAGAAG  | CACTGCTTGTT<br>GAGCGACCA             |
| A07:<br>2827<br>8890 | GAAGGTCGGAGTCAACGG<br>ATTAGAAGAAGAGGATGTC<br>CTGGAAG     | GAAGGTGACCAAGTTCATG<br>CTAGAAGAAGAGGATGTCC<br>TGGAAG     | TCCTCTGAGAT<br>TTGTTCAATAT<br>ATGTTC |

**Table S2.** Primer sequences used for clone sequencing.

| Marker          | Forward sequence (5'-3')  | Reverse sequence (5'-3')  |
|-----------------|---------------------------|---------------------------|
| <i>BrCLV1-1</i> | TCGTGATCGTCTTCTTTCCTCT    | ATTCGCCAAAAACGGTAGTG      |
| <i>BrCLV1-2</i> | TACATTTCTTTAAGATTCTTGAGGC | CATCTATTAACGGTCAGTTCAGATC |
| <i>BrCLV1-3</i> | TCTCGTGCTTCTTCTTGTTTCAT   | GAGAGATCCCAGAGAGTTACGG    |
| <i>BrCLV1-4</i> | CAAAATTCAAAACCAAAACAAAC   | GAACAAGAAGAAGCACGAGAGA    |
| <i>BrCLV1-5</i> | GCCATCATCAATAAGCATACAA    | TGCATAGAGACGTTAAGTCCAAT   |

**Table S3.** Primer sequences for qRT-PCR.

| Marker             | Forward sequence (5'-3') | Reverse sequence (5'-3') |
|--------------------|--------------------------|--------------------------|
| <i>Actin</i>       | ATCTACGAGGGTTATGCT       | CCACTGAGGACGATGTTT       |
| <i>BrCLV1</i> -qRT | CGGTGCTGCTTCTGAGTGTATG   | CGTG TTCCTCACCCACCTAACTA |



**Table S4.** Quality statistics of raw data.

| Sample           |     | Reads<br>Number | Total<br>Bases(bp) | N(%)   | GC(%) | Q20(%) | Q30(%) |
|------------------|-----|-----------------|--------------------|--------|-------|--------|--------|
| <i>slm</i>       |     | 52,570,348      | 7,885,552,200      | 0.0005 | 38.35 | 97.18  | 92.65  |
| Mutant-phenotype | DNA | 141,247,084     | 21,187,062,600     | 0.0002 | 38.18 | 96.54  | 91.00  |
| mixed pool       |     |                 |                    |        |       |        |        |

**Table S5.** Statistics of high quality (HQ) data.

| Sample                             | HQ<br>reads_number | HQ<br>reads% | HQ Bases(bp)   | HQ<br>Bases% |
|------------------------------------|--------------------|--------------|----------------|--------------|
| <i>slm</i>                         | 51,983,342         | 98.88        | 7,717,466,695  | 97.87        |
| Mutant-phenotype DNA mixed<br>pool | 139,638,760        | 98.86        | 20,722,467,565 | 97.81        |

**Table S6.** Statistics of sequence alignment reference genome.

| Sample           |     | Mapped_reads | Mapping_rate |
|------------------|-----|--------------|--------------|
| FT               |     | 94,719,968   | 98.00%       |
| <i>slm</i>       |     | 51,983,342   | 98.50%       |
| Mutant-phenotype | DNA | 139,638,760  | 98.80%       |
| mixed pool       |     |              |              |

**Table S7.** Genotype results of four candidate SNPs (SNP A07: 26905702, SNP A07:27571059, SNP A07: 27921459, SNP A07:28278890).

|                | Phenotype | Genotype: SNP<br>A07: 26905702 | Genotype: SNP<br>A07: 27571059 | Genotype: SNP<br>A07: 27921459 | Genotype: SNP<br>A07: 28278890 |
|----------------|-----------|--------------------------------|--------------------------------|--------------------------------|--------------------------------|
| FT             | wild-type | C/C                            | C/C                            | C/C                            | C/C                            |
| <i>slm</i>     | mutant    | T/T                            | T/T                            | T/T                            | T/T                            |
| F <sub>1</sub> | wild-type | T/C                            | T/C                            | T/C                            | T/C                            |
| s1             | mutant    | T/T                            | T/T                            | T/T                            | T/T                            |
| s2             | mutant    | T/T                            | T/C                            | T/C                            | T/C                            |
| s3             | mutant    | T/T                            | T/T                            | T/T                            | T/T                            |
| s4             | mutant    | T/T                            | T/T                            | T/T                            | T/T                            |
| s5             | mutant    | T/T                            | T/T                            | T/T                            | T/T                            |
| s6             | mutant    | T/T                            | T/T                            | T/C                            | T/C                            |
| s7             | mutant    | T/T                            | T/T                            | T/T                            | T/T                            |
| s8             | mutant    | T/T                            | T/T                            | T/T                            | T/T                            |
| s9             | mutant    | T/T                            | T/T                            | T/T                            | T/T                            |
| s10            | mutant    | T/T                            | T/T                            | T/T                            | T/T                            |
| s11            | mutant    | T/T                            | T/T                            | T/T                            | T/T                            |
| s12            | mutant    | T/T                            | T/T                            | T/T                            | T/T                            |
| s13            | mutant    | T/T                            | T/T                            | T/T                            | T/T                            |
| s14            | mutant    | T/T                            | T/T                            | T/T                            | T/T                            |
| s15            | mutant    | T/T                            | T/T                            | T/T                            | T/T                            |
| s16            | mutant    | T/T                            | T/T                            | T/T                            | T/T                            |
| s17            | mutant    | T/T                            | T/T                            | T/T                            | T/T                            |
| s18            | mutant    | T/T                            | T/T                            | T/T                            | T/T                            |
| s19            | mutant    | T/T                            | T/T                            | T/T                            | T/T                            |
| s20            | mutant    | T/T                            | T/T                            | T/T                            | T/T                            |
| s21            | mutant    | T/T                            | T/T                            | T/T                            | T/T                            |
| s22            | mutant    | T/T                            | T/T                            | T/C                            | T/C                            |
| s23            | mutant    | T/T                            | T/T                            | T/T                            | T/T                            |
| s24            | mutant    | T/T                            | T/T                            | T/T                            | T/T                            |
| s25            | mutant    | T/T                            | T/T                            | T/T                            | T/T                            |
| s26            | mutant    | T/T                            | T/T                            | T/T                            | T/T                            |
| s27            | mutant    | T/T                            | T/T                            | T/T                            | T/T                            |
| s28            | mutant    | T/T                            | T/T                            | T/T                            | T/T                            |
| s29            | mutant    | T/T                            | T/T                            | T/T                            | T/T                            |
| s30            | mutant    | T/T                            | T/T                            | T/T                            | T/T                            |
| s31            | mutant    | T/T                            | T/T                            | T/T                            | T/T                            |
| s32            | mutant    | T/T                            | T/T                            | T/T                            | T/T                            |
| s33            | mutant    | T/T                            | T/T                            | T/T                            | T/T                            |
| s34            | mutant    | T/T                            | T/T                            | T/T                            | T/T                            |
| s35            | mutant    | T/T                            | T/T                            | T/T                            | T/T                            |
| s36            | mutant    | T/T                            | T/T                            | T/T                            | T/T                            |
| s37            | mutant    | T/T                            | T/T                            | T/T                            | T/T                            |

|     |        |     |     |     |     |
|-----|--------|-----|-----|-----|-----|
| s38 | mutant | T/T | T/T | T/T | T/T |
| s39 | mutant | T/T | T/T | T/T | T/T |
| s40 | mutant | T/T | T/T | T/T | T/T |
| s41 | mutant | T/T | T/T | T/T | T/T |
| s42 | mutant | T/T | T/T | T/T | T/T |
| s43 | mutant | T/T | T/T | T/T | T/T |
| s44 | mutant | T/T | T/T | T/T | T/T |
| s45 | mutant | T/T | T/T | T/T | T/T |
| s46 | mutant | T/T | T/T | T/T | T/T |
| s47 | mutant | T/T | T/T | T/T | T/T |
| s48 | mutant | T/T | T/T | T/T | T/T |
| s49 | mutant | T/T | T/T | T/T | T/T |
| s50 | mutant | T/T | T/T | T/T | T/T |
| s51 | mutant | T/T | T/T | T/T | T/T |
| s52 | mutant | T/T | T/T | T/T | T/T |
| s53 | mutant | T/T | T/T | T/T | T/T |
| s54 | mutant | T/T | T/T | T/T | T/T |
| s55 | mutant | T/T | T/T | T/T | T/T |
| s56 | mutant | T/T | T/T | T/T | T/T |
| s57 | mutant | T/T | T/T | T/T | T/T |
| s58 | mutant | T/T | T/T | T/T | T/T |
| s59 | mutant | T/T | T/T | T/T | T/T |
| s60 | mutant | T/T | T/T | T/T | T/T |
| s61 | mutant | T/T | T/T | T/T | T/T |
| s62 | mutant | T/T | T/T | T/T | T/T |
| s63 | mutant | T/T | T/T | T/T | T/T |
| s64 | mutant | T/T | T/T | T/T | T/T |
| s65 | mutant | T/T | T/T | T/T | T/C |
| s66 | mutant | T/T | T/T | T/C | T/C |
| s67 | mutant | T/T | T/T | T/T | T/T |
| s68 | mutant | T/T | T/T | T/T | T/T |
| s69 | mutant | T/T | T/T | T/T | T/C |
| s70 | mutant | T/T | T/T | T/T | T/T |
| s71 | mutant | T/T | T/T | T/T | T/T |
| s72 | mutant | T/T | T/T | T/T | T/T |
| s73 | mutant | T/T | T/T | T/T | T/T |
| s74 | mutant | T/T | T/T | T/T | T/C |
| s75 | mutant | T/T | T/T | T/T | T/T |
| s76 | mutant | T/T | T/T | T/T | T/T |
| s77 | mutant | T/T | T/T | T/T | T/T |
| s78 | mutant | T/T | T/T | T/T | T/T |
| s79 | mutant | T/T | T/T | T/T | T/T |
| s80 | mutant | T/T | T/T | T/T | T/T |
| s81 | mutant | T/T | T/T | T/T | T/T |

|     |           |     |     |     |     |
|-----|-----------|-----|-----|-----|-----|
| s82 | mutant    | T/T | T/T | T/T | T/T |
| s83 | mutant    | T/T | T/T | T/T | T/T |
| s84 | mutant    | T/T | T/T | T/T | T/T |
| s85 | mutant    | T/T | T/T | T/T | T/T |
| s86 | mutant    | T/T | T/T | T/T | T/T |
| s87 | mutant    | T/T | T/T | T/T | T/T |
| s88 | mutant    | T/T | T/T | T/T | T/T |
| s89 | mutant    | T/T | T/T | T/T | T/T |
| s90 | mutant    | T/T | T/T | T/T | T/T |
| s91 | mutant    | T/T | T/T | T/T | T/T |
| s92 | mutant    | T/T | T/C | T/C | T/C |
| s93 | mutant    | T/T | T/T | T/T | T/T |
| s94 | mutant    | T/T | T/T | T/T | T/T |
| s95 | mutant    | T/T | T/C | T/C | T/C |
| s96 | mutant    | T/T | T/T | T/T | T/T |
| s97 | mutant    | T/T | T/T | T/T | T/T |
| s98 | mutant    | T/T | T/T | T/T | T/T |
| s99 | mutant    | T/T | T/T | T/T | T/C |
| F1  | wild-type | T/C | T/C | T/C | T/C |
| F2  | wild-type | C/C | C/C | C/C | C/C |
| F3  | wild-type | T/C | T/C | T/C | T/C |
| F4  | wild-type | C/C | C/C | C/C | T/C |
| F5  | wild-type | T/C | T/C | C/C | T/C |
| F6  | wild-type | T/C | T/C | T/C | T/C |
| F7  | wild-type | C/C | T/C | C/C | T/C |
| F8  | wild-type | T/C | T/C | T/C | T/C |
| F9  | wild-type | T/C | T/C | T/C | T/C |
| F10 | wild-type | C/C | C/C | C/C | T/C |
| F11 | wild-type | C/C | C/C | C/C | C/C |
| F12 | wild-type | T/C | T/C | T/C | T/C |
| F13 | wild-type | C/C | C/C | C/C | C/C |
| F14 | wild-type | T/C | T/C | T/C | T/C |
| F15 | wild-type | T/C | T/C | T/C | T/C |
| F16 | wild-type | T/C | T/C | T/C | T/C |
| F17 | wild-type | C/C | C/C | T/C | T/C |
| F18 | wild-type | T/C | T/C | T/C | T/C |
| F19 | wild-type | T/C | T/C | T/C | T/C |
| F20 | wild-type | T/C | T/C | C/C | C/C |
| F21 | wild-type | T/C | T/C | T/C | T/C |
| F22 | wild-type | T/C | T/C | T/C | T/C |
| F23 | wild-type | T/C | T/C | C/C | C/C |
| F24 | wild-type | T/C | T/C | T/C | T/C |
| F25 | wild-type | T/C | T/C | T/C | T/C |
| F26 | wild-type | T/C | T/C | T/C | T/C |

|     |           |     |     |     |     |
|-----|-----------|-----|-----|-----|-----|
| F27 | wild-type | T/C | T/C | T/C | T/C |
| F28 | wild-type | T/C | T/C | T/C | T/T |
| F29 | wild-type | T/C | T/C | T/C | T/C |
| F30 | wild-type | T/C | T/C | T/C | T/C |
| F31 | wild-type | C/C | C/C | C/C | C/C |
| F32 | wild-type | C/C | C/C | C/C | C/C |
| F33 | wild-type | C/C | C/C | C/C | C/C |
| F34 | wild-type | T/C | C/C | C/C | T/C |
| F35 | wild-type | C/C | C/C | C/C | C/C |
| F36 | wild-type | C/C | C/C | C/C | C/C |
| F37 | wild-type | T/C | T/T | T/T | T/T |
| F38 | wild-type | T/C | T/C | T/C | T/C |
| F39 | wild-type | T/C | T/C | T/C | T/C |
| F40 | wild-type | T/C | T/C | T/C | T/C |
| F41 | wild-type | C/C | C/C | C/C | C/C |
| F42 | wild-type | C/C | C/C | C/C | C/C |
| F43 | wild-type | T/C | T/C | T/C | T/C |
| F44 | wild-type | C/C | C/C | C/C | C/C |
| F45 | wild-type | T/C | T/C | T/C | T/C |
| F46 | wild-type | C/C | C/C | C/C | C/C |
| F47 | wild-type | T/C | T/C | T/C | T/C |
| F48 | wild-type | T/C | T/C | T/C | T/C |
| F49 | wild-type | T/C | T/C | T/C | T/C |
| F50 | wild-type | T/C | T/C | T/C | T/C |
| F51 | wild-type | T/C | T/C | T/C | T/C |
| F52 | wild-type | C/C | C/C | C/C | C/C |
| F53 | wild-type | C/C | C/C | C/C | C/C |
| F54 | wild-type | T/C | T/C | T/C | T/C |
| F55 | wild-type | T/C | T/C | T/C | T/C |
| F56 | wild-type | T/C | T/C | T/C | T/C |
| F57 | wild-type | T/C | T/C | T/C | T/C |
| F58 | wild-type | T/C | T/C | T/C | T/C |
| F59 | wild-type | T/C | T/C | T/T | T/T |
| F60 | wild-type | T/C | T/C | T/C | T/C |
| F61 | wild-type | T/C | T/C | T/C | T/C |
| F62 | wild-type | T/C | T/C | T/C | T/C |
| F63 | wild-type | C/C | C/C | C/C | C/C |
| F64 | wild-type | C/C | T/C | T/C | T/C |
| F65 | wild-type | T/C | T/C | T/C | T/C |
| F66 | wild-type | T/C | T/C | T/C | T/C |
| F67 | wild-type | T/C | T/C | T/C | T/C |
| F68 | wild-type | C/C | C/C | C/C | C/C |
| F69 | wild-type | T/C | T/C | T/C | T/C |
| F70 | wild-type | C/C | T/C | T/C | T/C |

---

|     |           |     |     |     |     |
|-----|-----------|-----|-----|-----|-----|
| F71 | wild-type | T/C | T/C | T/C | T/C |
| F72 | wild-type | T/C | T/C | T/C | T/C |
| F73 | wild-type | T/C | T/C | T/C | T/C |
| F74 | wild-type | T/C | T/C | T/C | T/C |
| F75 | wild-type | C/C | C/C | C/C | C/C |
| F76 | wild-type | T/C | T/C | T/C | T/C |
| F77 | wild-type | C/C | C/C | C/C | C/C |
| F78 | wild-type | T/C | T/C | T/C | T/C |
| F79 | wild-type | T/C | C/C | C/C | C/C |
| F80 | wild-type | T/C | T/C | T/C | T/C |
| F81 | wild-type | T/C | T/C | T/C | T/C |
| F82 | wild-type | T/C | T/C | C/C | C/C |
| F83 | wild-type | T/C | T/C | T/C | T/C |
| F84 | wild-type | T/C | T/C | T/C | T/C |
| F85 | wild-type | T/C | T/C | T/C | T/C |
| F86 | wild-type | C/C | C/C | T/C | T/C |
| F87 | wild-type | T/C | T/C | T/C | T/C |
| F88 | wild-type | C/C | C/C | C/C | C/C |
| F89 | wild-type | C/C | C/C | C/C | C/C |
| F90 | wild-type | T/C | T/C | T/C | T/C |

---



**Table S8.** Prediction of transmembrane helices by TMHMM-2.0.

| Prediction | Start | end |
|------------|-------|-----|
| inside     | 1     | 12  |
| TMhelix    | 13    | 35  |
| outside    | 36    | 647 |
| TMhelix    | 648   | 666 |
| inside     | 667   | 861 |

**Table S9.** Prediction of signal peptides and the location of their cleavage sites in proteins by SignalP-6.0.

| Protein type | Other  | Signal Peptide (Sec/SPI) | cleavage sites (Probability)         |
|--------------|--------|--------------------------|--------------------------------------|
| Likelihood   | 0.0212 | 0.9787                   | between position 31 and 32(0.946839) |
